# Supplementary material for: Preparation and Characterization of TiO2-PVDF/PMMA Blend Membranes Using an Alternative Non-Toxic Solvent for UF/MF and Photocatalytic Application
Source: PubMed Central journal article supplement (PMC6412202; doi:10.3390/molecules24040724), 2019-02-17
Supplement: molecules-24-00724-s001.pdf [file molecules-24-00724-s001.pdf]

Supporting material

# Preparation and characterization of TiO<sub>2</sub>-PVDF/PMMA blend membranes using an alternative non-toxic solvent for UF/MF and photocatalytic application

**Ouassila Benhabiles** <sup>1,4</sup>, **Francesco Galiano** <sup>2\*</sup>, **Tiziana Marino** <sup>2</sup>, **Hacene Mahmoudi** <sup>3</sup>, **Hakim Lounici** <sup>4,5</sup>, **Alberto Figoli** <sup>2\*</sup>

<sup>1</sup> Unité de Développement des Equipements Solaires, UDES /Centre de Développement des Energies Renouvelables, CDER, 42004, Tipaza, Algeria.

<sup>2</sup> Institute on Membrane Technology (ITM-CNR), Via P. Bucci 17c, 87036 Rende (CS), Italy

<sup>3</sup> Faculty of Technology, University Hassiba Benbouali of Chlef, Chlef, Algeria,

<sup>4</sup> Département génie de l'Environnement, Ecole Nationale Polytechnique, Alger, Algérie,

<sup>5</sup> Faculty of Science, University of Bouira, Algeria

\* Correspondence: [f.galiano@itm.cnr.it](mailto:f.galiano@itm.cnr.it); [a.figoli@itm.cnr.it](mailto:a.figoli@itm.cnr.it);

M1

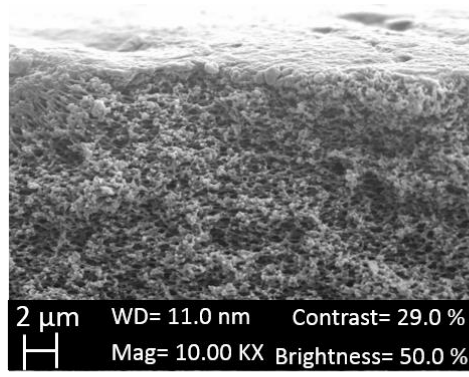

M2

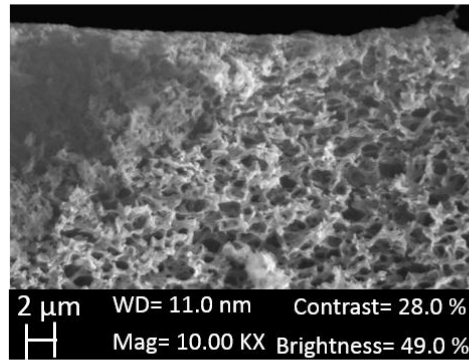

M3

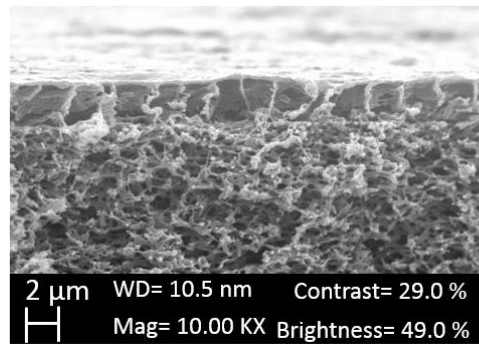

**Figure S1.** SEM magnification cross-sections of M1, M2 and M3 membranes

M4

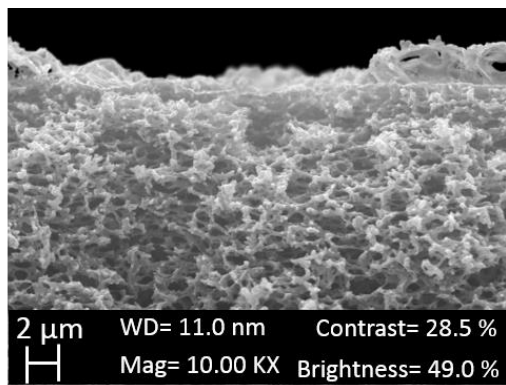

M2

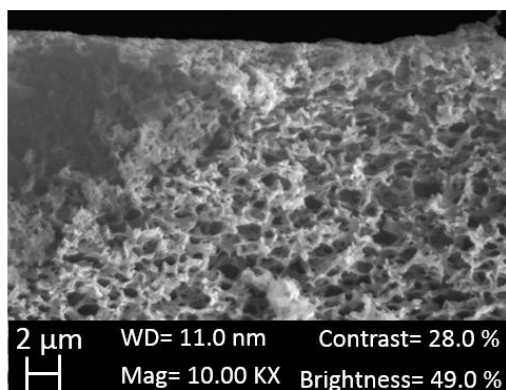

M5

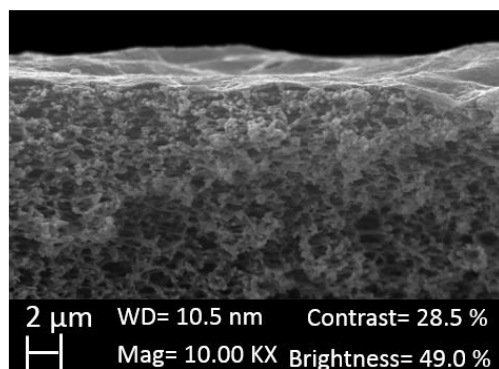

**Figure S2.** SEM magnification cross-sections of M4, M2 and M5 membranes

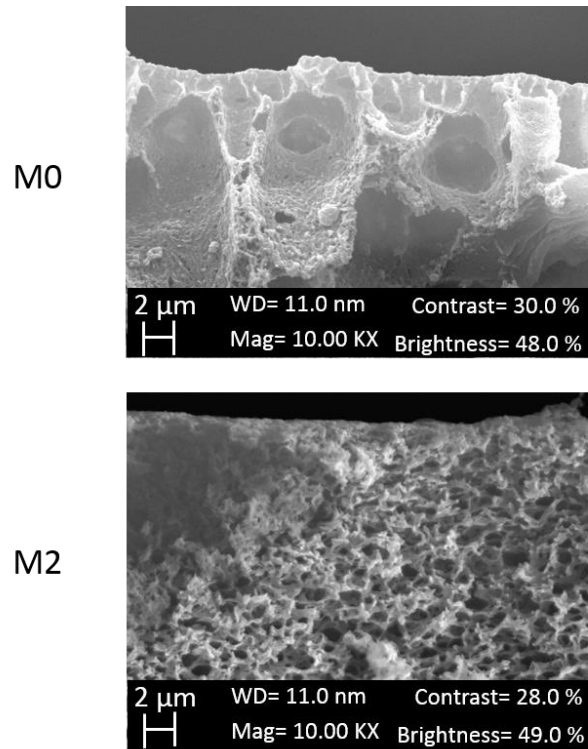

Figure S3. SEM magnification cross-sections of M0 and M2 and M5 membranes

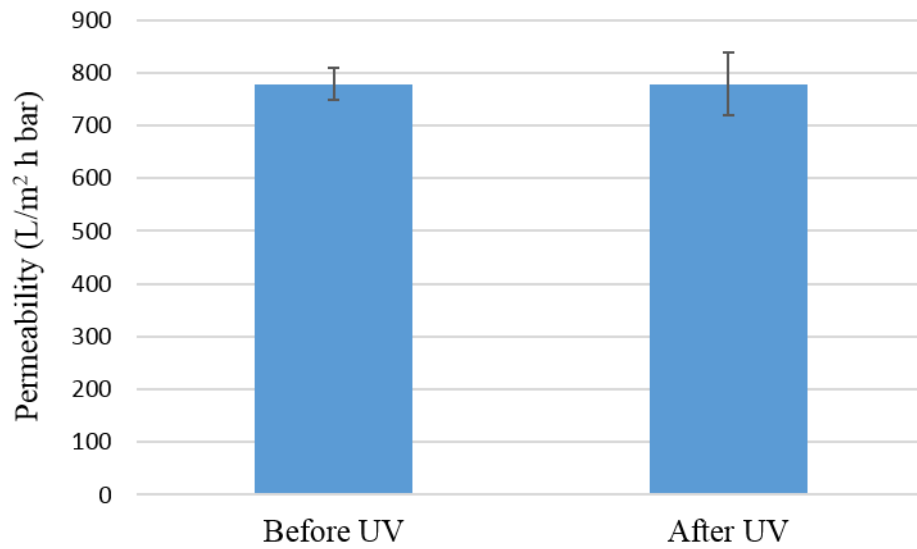

Figure S4. PWP of M8 membrane before and after UV irradiation
